# Supplementary material for: Paradoxical Sensitivity to an Integrated Stress Response Blocking Mutation in Vanishing White Matter Cells
Source: PubMed Central journal article supplement (PMC5094784; doi:10.1371/journal.pone.0166278), 2016-11-03

**A**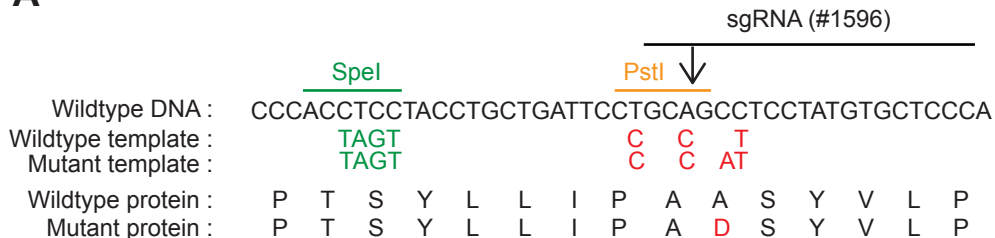**B**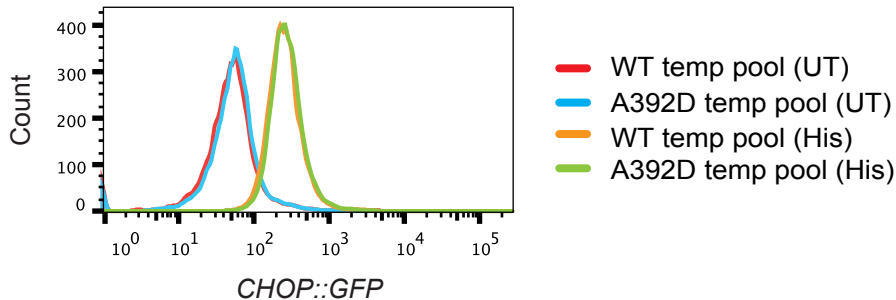

Supplement: pone.0166278.s002.pdf [file pone.0166278.s002.pdf]
