# Supplementary material for: Paradoxical Sensitivity to an Integrated Stress Response Blocking Mutation in Vanishing White Matter Cells
Source: PubMed Central journal article supplement (PMC5094784; doi:10.1371/journal.pone.0166278), 2016-11-03
Supplement: pone.0166278.s004.pdf [file pone.0166278.s004.pdf]

**S1 Table Oligo DNA list**

| No. | Name                              | Oligo Sequence                                                                                                                                                                                                                                    | Used for                                                |
|-----|-----------------------------------|---------------------------------------------------------------------------------------------------------------------------------------------------------------------------------------------------------------------------------------------------|---------------------------------------------------------|
| 1   | haEIF2B3_g299541F_981             | CACCGGCGAATGAACGAGGTAATTG                                                                                                                                                                                                                         | Construction for an sgRNA/Cas9 plasmid targeting EIF2B3 |
| 2   | haEIF2B3_g299541R_982             | AAACCAATTACCTCGTTTCATTCGCC                                                                                                                                                                                                                        | Construction for an sgRNA/Cas9 plasmid targeting EIF2B3 |
| 3   | haEIF2B3_Int_S_SacI_977           | GAAGAGTCCAAAGCATCCATGCTAT                                                                                                                                                                                                                         | Construction for an EIF2B3_3XFLAG repair template       |
| 4   | haEIF2B3_Ex11_AS_EcoRI_978        | CAGGAATTCGATCTCCATGAGTTGATCACTTCTACAAITACCTCGTTTCAT                                                                                                                                                                                               | Construction for an EIF2B3_3XFLAG repair template       |
| 5   | haEIF2B3_Ex11_S_ApaI_979          | TGAGGGCCGCTCTGAACAAGCCTGACCCCT                                                                                                                                                                                                                    | Construction for an EIF2B3_3XFLAG repair template       |
| 6   | haEIF2B3_3genome_AS_KpnI_980      | ACCGGTACCTTAAATCTTGATCTCTCTGC                                                                                                                                                                                                                     | Construction for an EIF2B3_3XFLAG repair template       |
| 7   | haEIF2B3_5OUT_S_1029              | TGCATGCATGTGGTATACGTACGTG                                                                                                                                                                                                                         | Genotyping for EIF2B3_3FLAG insertion                   |
| 8   | haEIF2B3_OUT_AS_992               | CAGCCCTTAAATCTTGATCTCTCT                                                                                                                                                                                                                          | Genotyping for EIF2B3_3FLAG insertion                   |
| 9   | haEIF2B4_g257792F_1171            | CACCGGCTGCAGGAATCAGCAGGT                                                                                                                                                                                                                          | Construction for an sgRNA/Cas9 plasmid targeting EIF2B4 |
| 10  | haEIF2B4_g257792R_1172            | AAACACCTGCTGATTCCTGCAGCCC                                                                                                                                                                                                                         | Construction for an sgRNA/Cas9 plasmid targeting EIF2B4 |
| 11  | haEIF2B4_g257788F_1173            | CACCGGGGAGCACATAGGAGGCTGC                                                                                                                                                                                                                         | Construction for an sgRNA/Cas9 plasmid targeting EIF2B4 |
| 12  | haEIF2B4_g257788R_1174            | AAACGCAGCTCTATGTGCTCCCC                                                                                                                                                                                                                           | Construction for an sgRNA/Cas9 plasmid targeting EIF2B4 |
| 13  | haEIF2B4_EX10_1F_1161             | CTTAGAGAAGCCATTGATCGG                                                                                                                                                                                                                             | Construction for an EIF2B4 A392D repair template        |
| 14  | haEIF2B4_A392D_1R_1162            | AGCATATAGGAATCGGGGGAATCAGCAGGTAGGAGGTGG                                                                                                                                                                                                           | Construction for an EIF2B4 A392D repair template        |
| 15  | haEIF2B4_A392D_1F_1163            | CCCGCCGATCTCTATGTGCTCCAGAGGTGA                                                                                                                                                                                                                    | Construction for an EIF2B4 A392D repair template        |
| 16  | haEIF2B4_INT11_1R_1164            | TAAAGGCCAGTGAGGTGGCTCAAT                                                                                                                                                                                                                          | Construction for an EIF2B4 A392D repair template        |
| 17  | haEIF2B4_INT9_OUT1F_1159          | CTCAACATTTAGGCAAAAGTCAG                                                                                                                                                                                                                           | Genotyping for EIF2B4 A392 locus                        |
| 18  | haEIF2B4_INT11_OUT1R_1160         | TATAGGTACACAGAGAAACCC                                                                                                                                                                                                                             | Genotyping for EIF2B4 A392 locus                        |
| 19  | haEIF2B4_qPCR_L1_1496             | COGTGTATCACACTGCTTC                                                                                                                                                                                                                               | qPCR primer                                             |
| 20  | haEIF2B4_qPCR_R1_1497             | CTTCATGGGAGGTGTTGTG                                                                                                                                                                                                                               | qPCR primer                                             |
| 21  | haEIF2B1_qPCR_L1_1498             | GATGCTGCTTGGCTACAT                                                                                                                                                                                                                                | qPCR primer                                             |
| 22  | haEIF2B1_qPCR_R1_1499             | ATTCTCCGTTCTCAACCAC                                                                                                                                                                                                                               | qPCR primer                                             |
| 23  | haRpl27_1S_1489                   | ACAATCACCTCATGCCACAAG                                                                                                                                                                                                                             | qPCR primer                                             |
| 24  | haRpl27_1AS_1490                  | GCCTTTCAGGGCTGGGCTCTC                                                                                                                                                                                                                             | qPCR primer                                             |
| 25  | CHO_eif2s1_CrispyC_1s_1017        | CACCGGATCAGTTTGTITATAGAA                                                                                                                                                                                                                          | Construction for an sgRNA/Cas9 plasmid targeting eIF2a  |
| 26  | CHO_eif2s1_CrispyC_2AS_1020       | AAACTTCTATAACAAACTGATCC                                                                                                                                                                                                                           | Construction for an sgRNA/Cas9 plasmid targeting eIF2a  |
| 27  | CHO_IRE1_g_TM_s7_s_1151           | CACCGCCCGTTGACTCCATGCTCA                                                                                                                                                                                                                          | Construction for an sgRNA/Cas9 plasmid targeting IRE1a  |
| 28  | CHO_IRE1_g_TM_s7_as_1152          | AAACTGAGCATGGAGTCAACGGGGC                                                                                                                                                                                                                         | Construction for an sgRNA/Cas9 plasmid targeting IRE1a  |
| 29  | CHO_eif2s1_ssODN_C_1022           | AATGTAAGATCCATAGCTGAGATGGGAGCTATGTTAGCTTGTGGAAATAC<br>AATAACATTGAAGGCATGATCTTCTTAGTGAATTAAGCAGAAGACGTATT<br>CGTTCTATAAACAACCTGATCCGATGGCAGAAATGAATGTGTAGTTGTC<br>ATTAGAGTGGACA AAGAAA AAGGTAAGTGAGAAAAA<br>ATTAGAGTGGACA AAGAAA AAGGTAAGTGAGAAAAA | eIF2a S51A repair template                              |
| 30  | CHO_eif2s1_S51_WT_SacI_ssODN_1411 | AATGTAAGATCCATAGCTGAGATGGGAGCTATGTTAGCTTGTGGAAATAC<br>AATAACATTGAAGGCATGATCTTCTTAGTGAATTAAGCAGAAGACGTATT<br>CGTTCTATAAACAACCTGATCCGATGGCAGAAATGAATGTGTAGTTGTC<br>ATTAGAGTGGACA AAGAAA AAGGTAAGTGAGAAAAA                                           | eIF2a S51 WT repair template                            |
| 31  | haEIF2B4_A392D_v2_1R_1302         | ATAGGAATCGGGGGAATCAGCAGGTAAC TAGTGGGGACCCAGCAT                                                                                                                                                                                                    | Construction for an EIF2B4 A392D repair template        |
| 32  | haEIF2B4_A392WT_1R_1303           | ATAGGAATCGGGGGAATCAGCAGGTAAC TAGTGGGGACCCAGCAT                                                                                                                                                                                                    | Construction for an EIF2B4 A392 WT repair template      |
| 33  | haEIF2B4_g257760F_1254            | CACCGGGGAGTCACATCGTAGACC                                                                                                                                                                                                                          | Construction for an sgRNA/Cas9 plasmid targeting EIF2B4 |
| 34  | haEIF2B4_g257760R_1255            | AAACGGTCTACGATGTGACTCCCCC                                                                                                                                                                                                                         | Construction for an sgRNA/Cas9 plasmid targeting EIF2B4 |
| 35  | haEIF2B4_EX12_1F_1167             | TCATGCACCTCGGCAATGGAT                                                                                                                                                                                                                             | Construction for an EIF2B4 R484W repair template        |
| 36  | haEIF2B4_R484W_v2_1R_1250         | AGTCACATCGTACACAGATTCACAACACAGAGTGGTGGTTCTGCCAG<br>TT                                                                                                                                                                                             | Construction for an EIF2B4 R484W repair template        |
| 37  | haEIF2B4_R484W_v2_1F_1251         | TCTGGTGTACGATGTGACTCCCTGAGTGGTGCACCTGGTGATCACAGAA                                                                                                                                                                                                 | Construction for an EIF2B4 R484W repair template        |
| 38  | haEIF2B4_3UTR_1R_1170             | CATTATGTAGACTAGGCTGGCC                                                                                                                                                                                                                            | Construction for an EIF2B4 R484W repair template        |
| 39  | haEIF2B4_g257776F_1175            | CACCGGGGAGTCACATCGTAGACC                                                                                                                                                                                                                          | Construction for an sgRNA/Cas9 plasmid targeting EIF2B4 |
| 40  | haEIF2B4_g257776R_1176            | CACCGGCTTGCACTGCAGATCATCG                                                                                                                                                                                                                         | Construction for an sgRNA/Cas9 plasmid targeting EIF2B4 |
| 41  | haEIF2B4_R484W_1R_1168            | TCTCCCACCTTGCAATGGAGATCATCGGGTCCATCTGCCAA                                                                                                                                                                                                         | Construction for an EIF2B4 R468W repair template        |
| 42  | haEIF2B4_R484W_1F_1169            | CTCCAATGCAAGTGGGGAGAGCAGGTAGCCCTGGCTAA                                                                                                                                                                                                            | Construction for an EIF2B4 R468W repair template        |
